# Supplementary material for: Selecting effective eletrocatalyst from Cu single-atoms and nanoparticles for realizing highly sensitive electrochemical sensing of glucose and H2O2
Source: Royal Society of Chemistry journal article supplement (doi:10.1039/d4nr01926a), 2024-01-01
Supplement: d4nr01926a1.pdf [file d4nr01926a1.pdf]

**Selecting effective electrocatalyst from Cu single-atoms and  
nanoparticles for realizing highly sensitive electrochemical sensing  
of glucose and H<sub>2</sub>O<sub>2</sub>**

Ziyin Yang\*, Chongchao Zhang, Chengcheng Qi\*

School of Chemistry and Chemical Engineering, Qufu Normal University, P. R. China. E-mail

address: 1271627739@qq.com

Figure S1 (A) XPS spectra of Cu 2p of Cu SAs/CN and Cu NPs/C; (B) XPS spectra of N 1s of CN

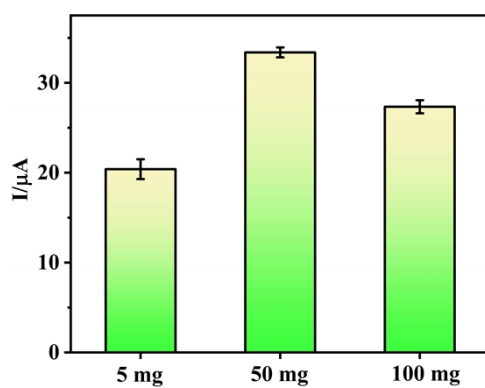

Figure S2. The current response of Cu SAs/CN toward 1 mM H<sub>2</sub>O<sub>2</sub> (Cu SAs/CN synthesized with 5, 50 and 100 mg Cu(CH<sub>3</sub>COO)<sub>2</sub>·H<sub>2</sub>O, respectively)
